# Supplementary material
Source: PubMed Central journal article supplement (PMC6684162)
Supplement: NIHMS1505449-supplement-1.pdf [file NIHMS1505449-supplement-1.pdf]

# Supplemental Material

Shift models for dose finding in partially ordered groups

Bethany Jablonski Horton, Nolan A. Wages, and Mark R. Conaway

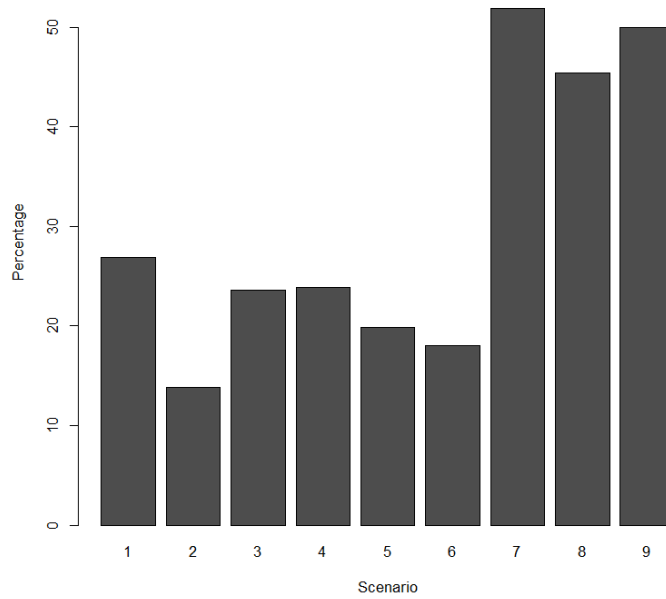

Figure S1: Independent CRM trials: simulations with at least 1 dose reversal (N=45)

Table S1: Independent CRM trials: magnitude of reversals

| Scenario | Magnitude of reversals |       |       |      |      |
|----------|------------------------|-------|-------|------|------|
|          | 0                      | 1     | 2     | 3    | 4    |
| 1        | 73.1%                  | 15.9% | 8.3%  | 2.1% | 0.6% |
| 2        | 86.2%                  | 10.2% | 2.7%  | 0.6% | 0.3% |
| 3        | 76.4%                  | 16.4% | 5.9%  | 1.1% | 0.2% |
| 4        | 76.1%                  | 16.4% | 6.0%  | 1.2% | 0.3% |
| 5        | 80.1%                  | 13.7% | 4.8%  | 1.4% | 0.0% |
| 6        | 82.0%                  | 11.2% | 5.2%  | 1.3% | 0.3% |
| 7        | 48.1%                  | 24.9% | 18.8% | 6.8% | 1.4% |
| 8        | 54.6%                  | 25.7% | 15.8% | 3.4% | 0.5% |
| 9        | 50.0%                  | 27.5% | 14.7% | 6.5% | 1.3% |

Table S2: Discrepancies: Percentage of trials with unequal MTDs between groups where MTD is the same (N=45)

| Scenario | Method                 | Magnitude of discrepancy |       |       |       |      |
|----------|------------------------|--------------------------|-------|-------|-------|------|
|          |                        | 0                        | 1     | 2     | 3     | 4    |
| 1        | Proposed method        | 36.2%                    | 30.1% | 26.0% | 7.7%  | 0%   |
|          | Independent CRM trials | 22.6%                    | 36.7% | 27.2% | 11.0% | 2.5% |
| 2        | Proposed method        | 22.7%                    | 27.1% | 37.3% | 13.2% | 0%   |
|          | Independent CRM trials | 12.7%                    | 28.9% | 30.4% | 23.6% | 4.4% |
| 7        | Proposed method        | 37.3%                    | 32.1% | 24.2% | 6.4%  | 0%   |
|          | Independent CRM trials | 6.5%                     | 31.6% | 38.1% | 20.1% | 3.7% |
| 8        | Proposed method        | 36.7%                    | 36.4% | 22.4% | 4.5%  | 0%   |
|          | Independent CRM trials | 10.0%                    | 40.4% | 35.5% | 11.3% | 2.8% |
| 9        | Proposed method        | 31.6%                    | 31.6% | 28.4% | 8.4%  | 0%   |
|          | Independent CRM trials | 6.0%                     | 29.9% | 37.1% | 22.5% | 4.5% |

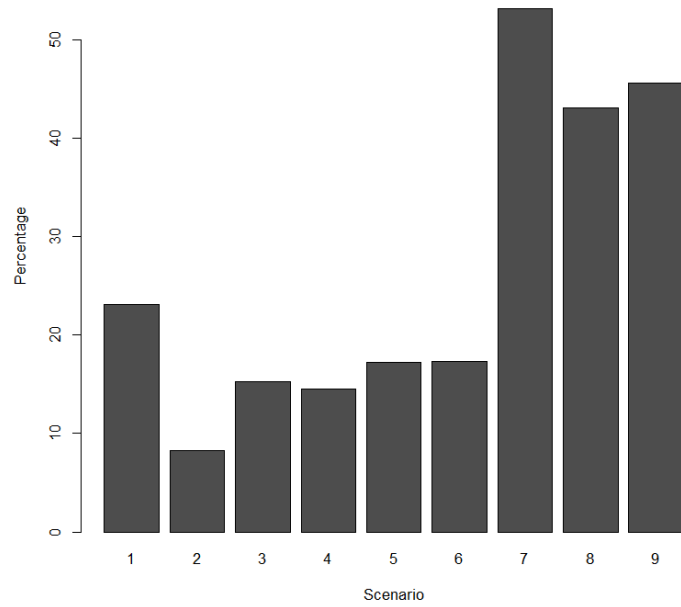

Figure S2: Independent CRM trials: simulations with at least 1 dose reversal (N=72)

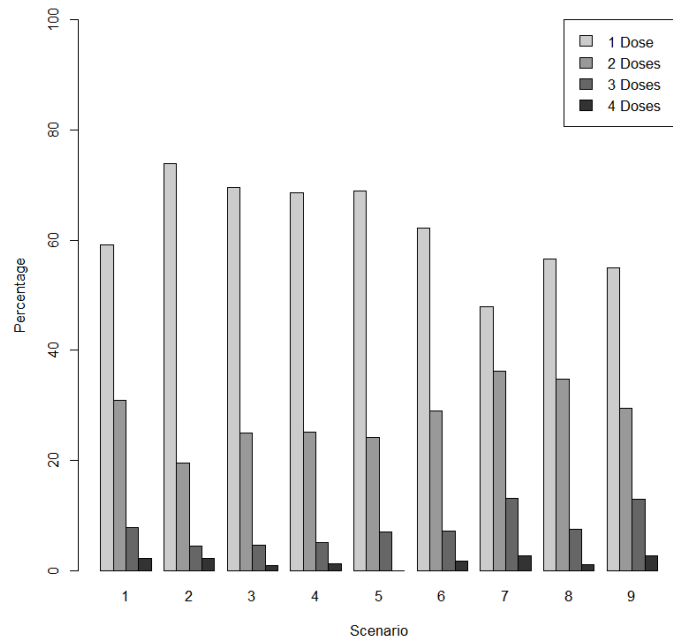

Figure S3: Independent CRM trials: maximum discrepancy in MTD selection (N=45)

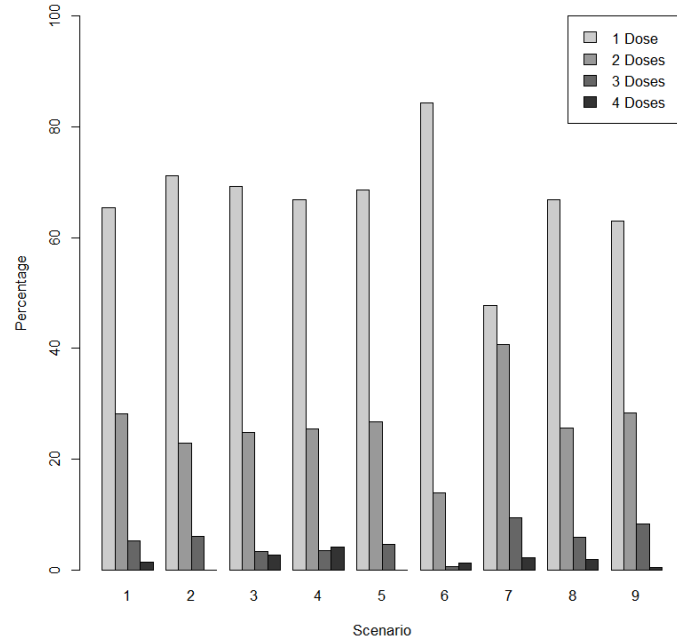

Figure S4: Independent CRM trials: maximum discrepancy in MTD selection (N=72)

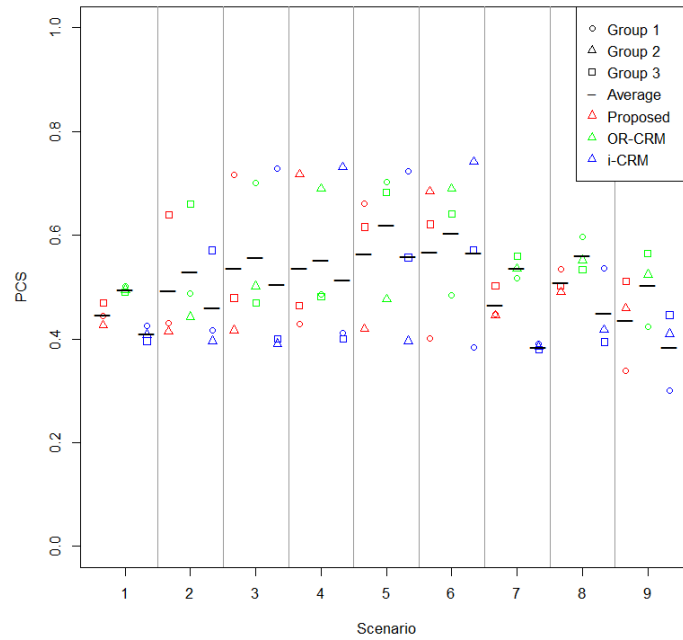

Figure S5: Percentage of correct selection (N=72)

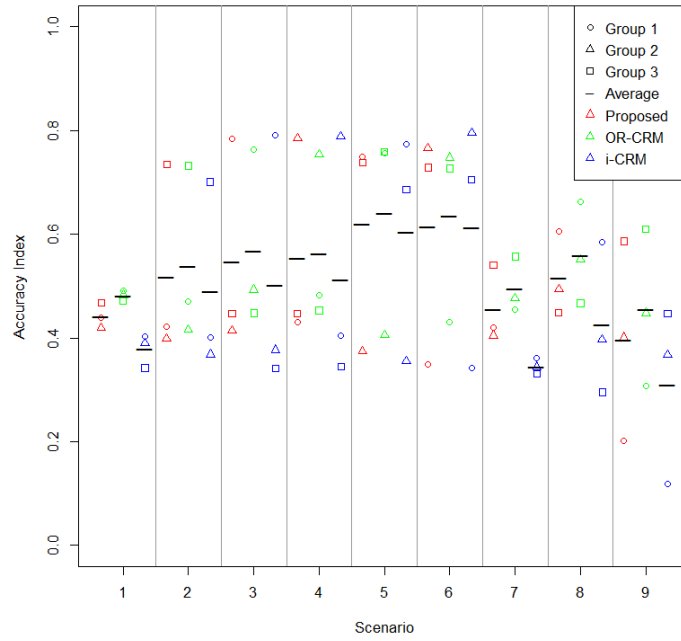

Figure S6: Accuracy index for dose selection (N=72)

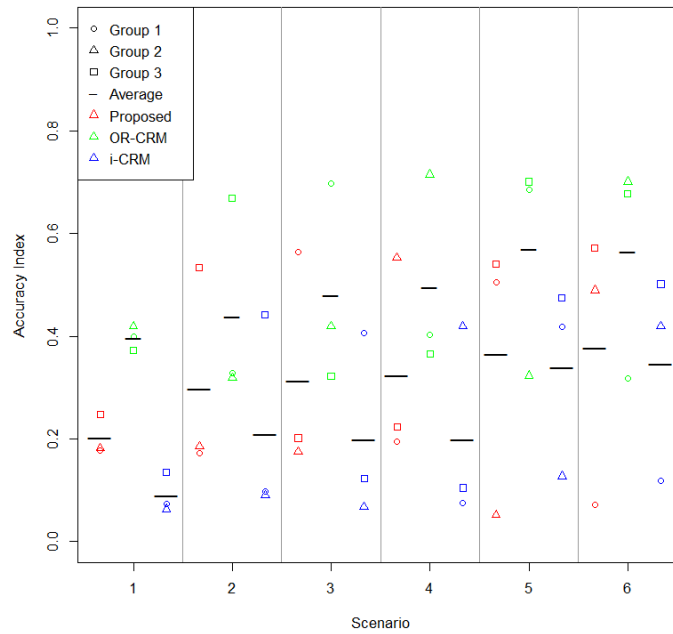

Figure S7: Accuracy index for subject allocation (N=45)

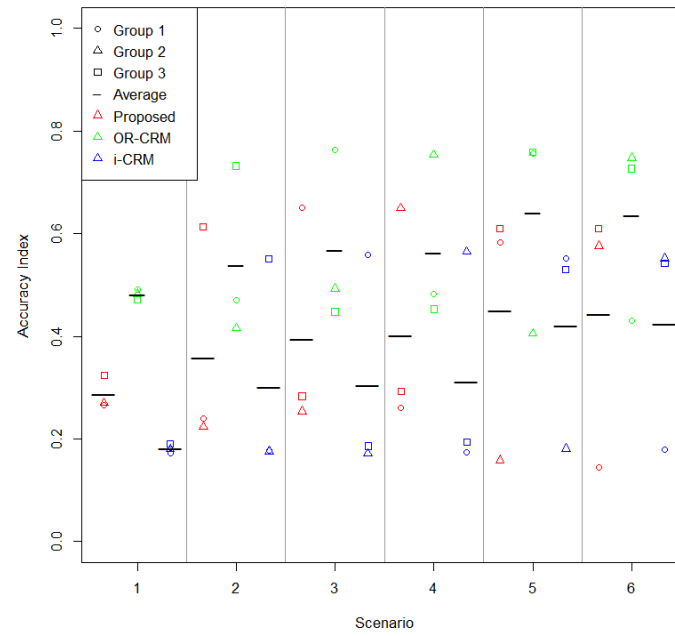

Figure S8: Accuracy index for subject allocation (N=72)
